# Supplementary material for: Seasonal variation in structure and function of gut microbiota in Pomacea canaliculata
Source: PubMed Central journal article supplement (PMC9336170; doi:10.1002/ece3.9162), 2022-07-29

# Rarefaction curves

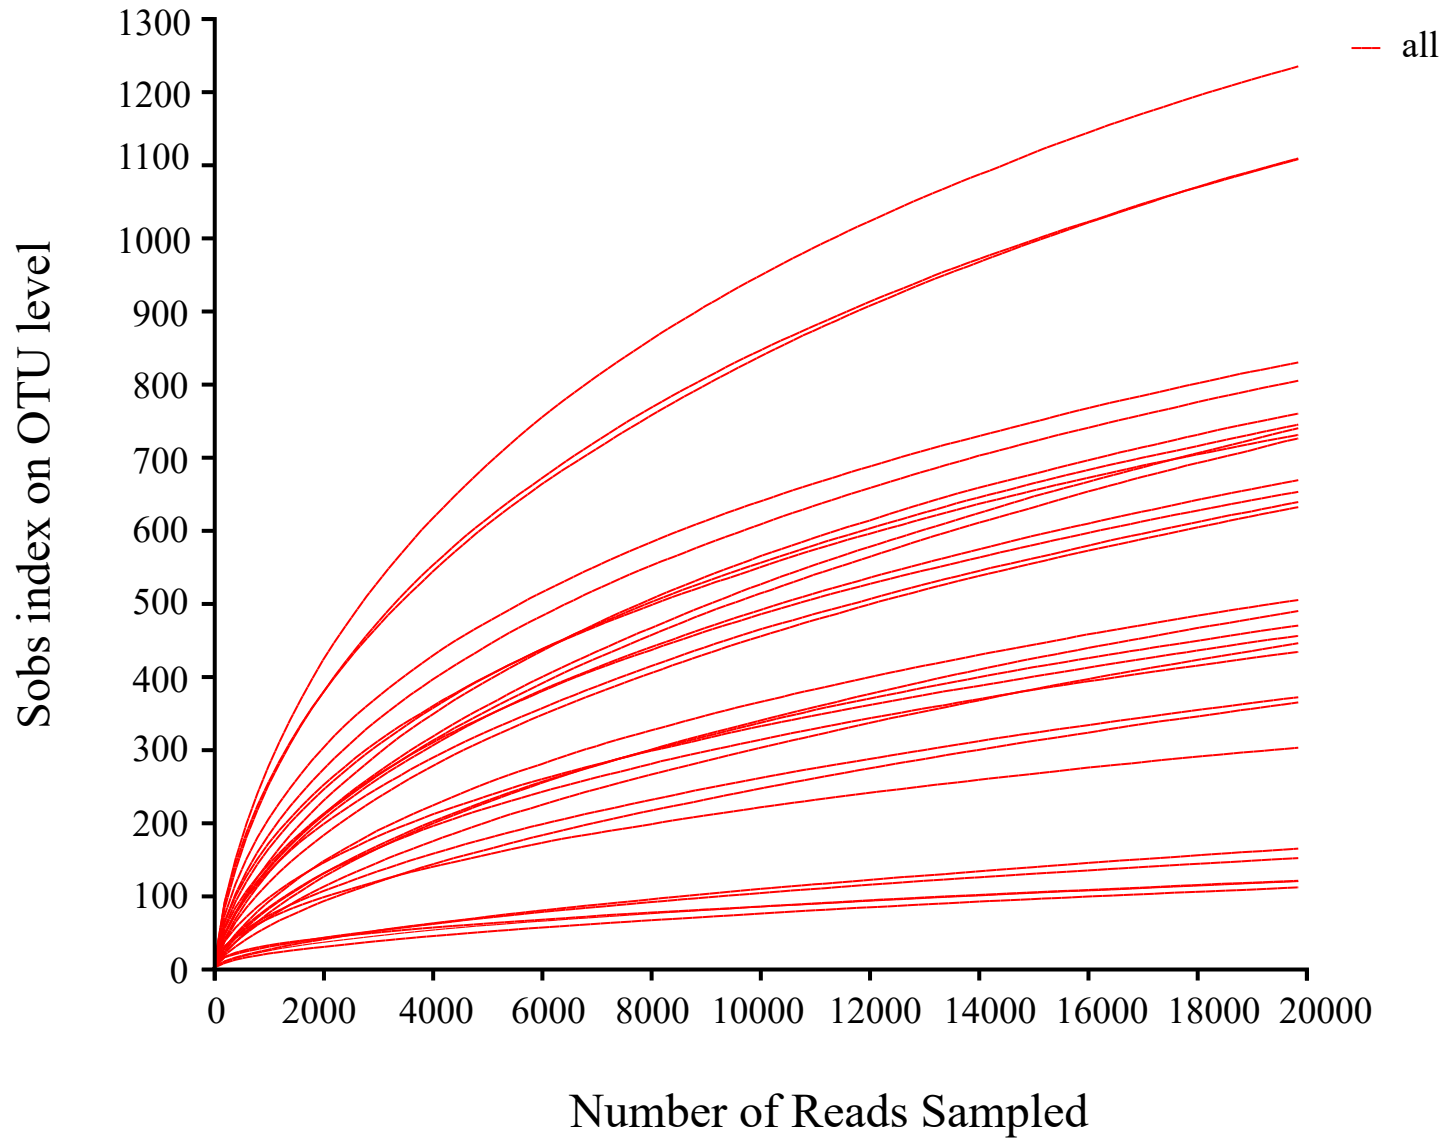

Supplement: ECE3-12-e9162-s002.pdf [file ECE3-12-e9162-s002.pdf]
